# Supplementary material for: Single-molecule long-read sequencing reveals the potential impact of posttranscriptional regulation on gene dosage effects on the avian Z chromosome
Source: PubMed Central journal article supplement (PMC8832729; doi:10.1186/s12864-022-08360-8), 2022-02-11

**a**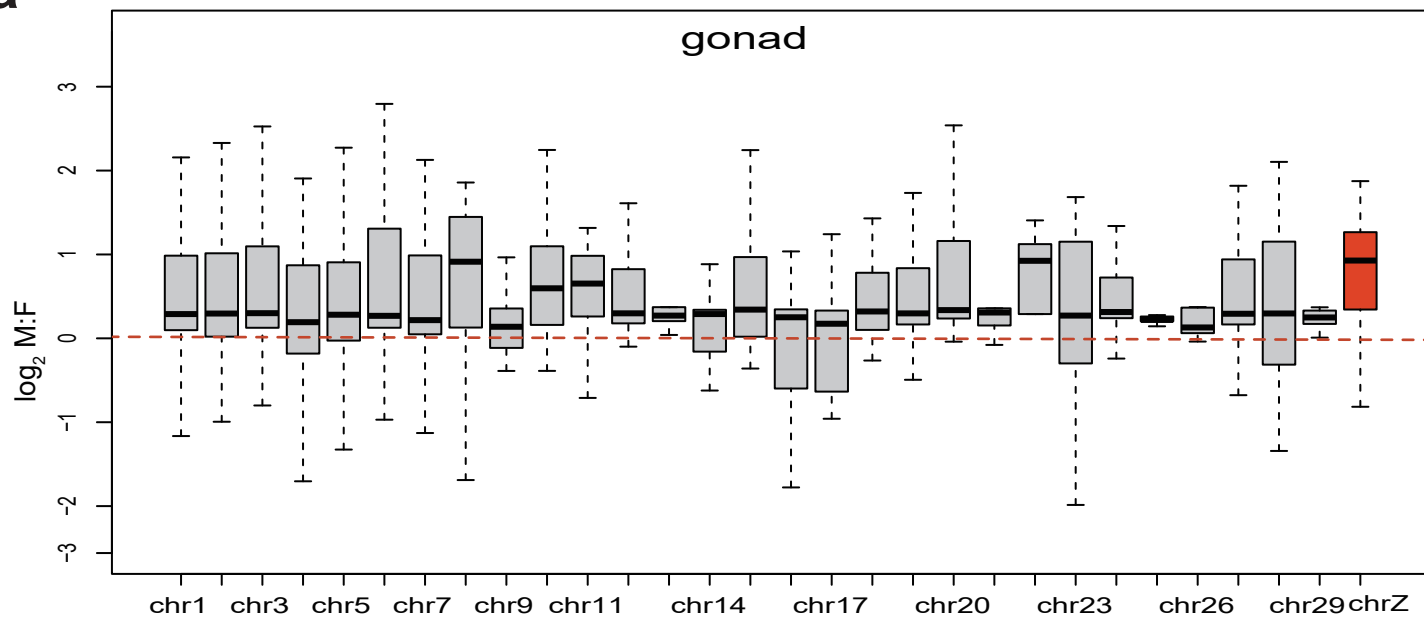**b**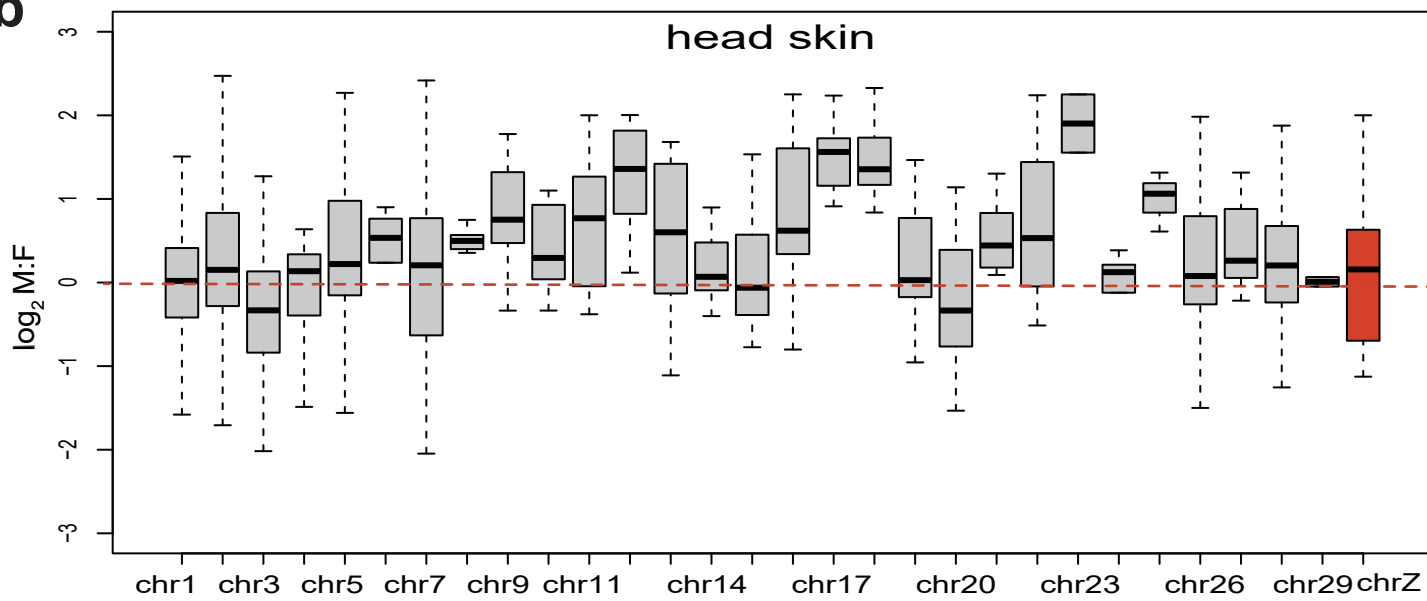

Supplement: 12864_2022_8360_MOESM10_ESM.pdf [file 12864_2022_8360_MOESM10_ESM.pdf]
